# Supplementary material
Source: MDPI journal article supplement (https://www.mdpi.com/2075-5309/14/5/1241)
Supplement: s1 [file s1]

## Supplementary Information

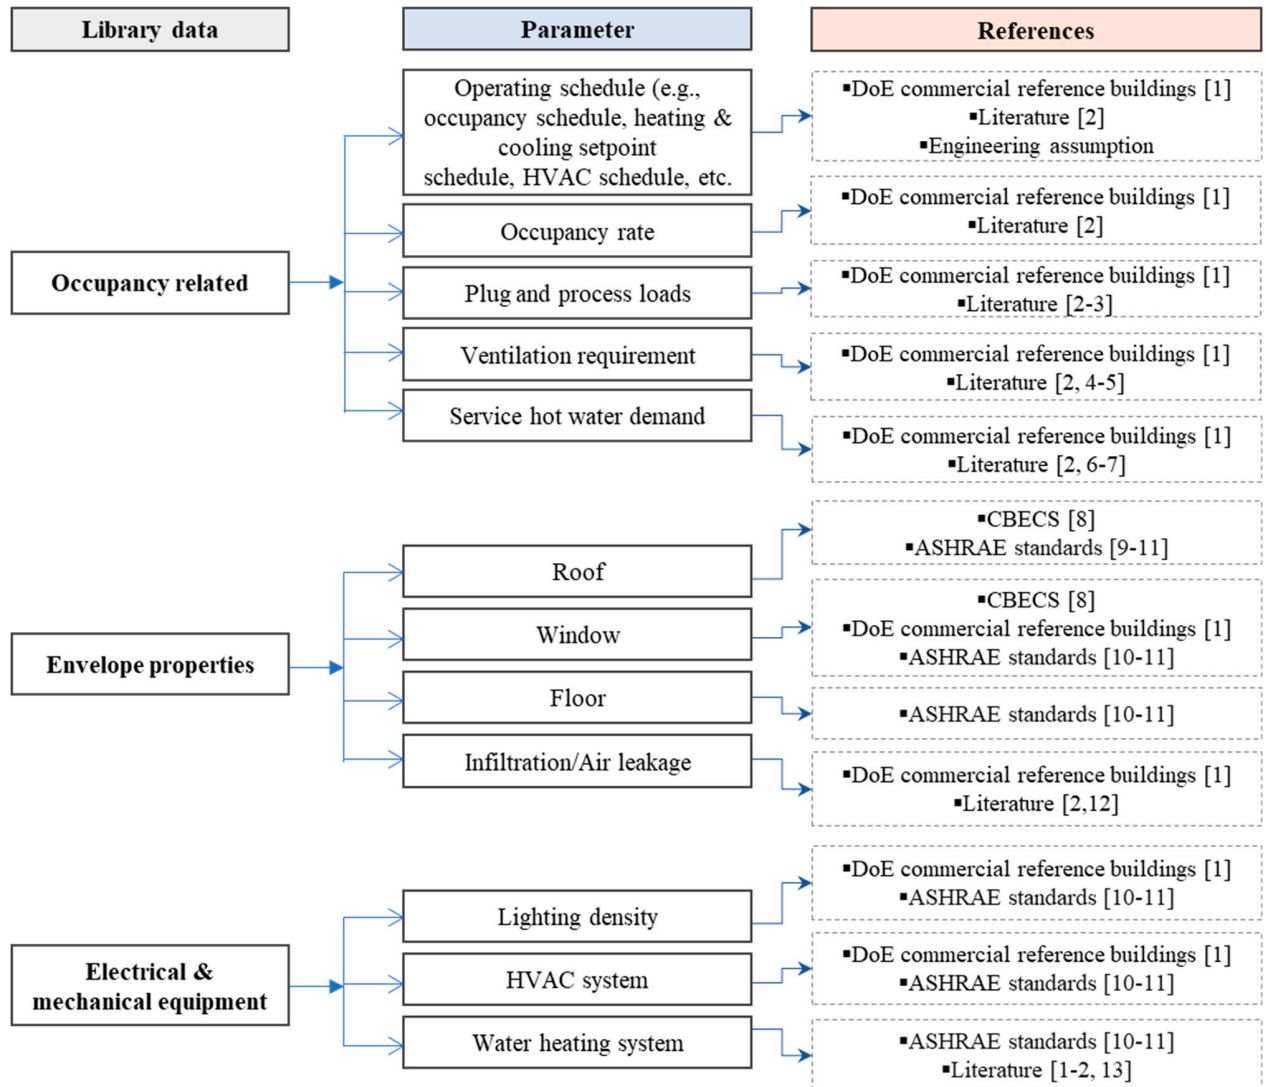

Figure S1. Archetype library for the studied commercial buildings.

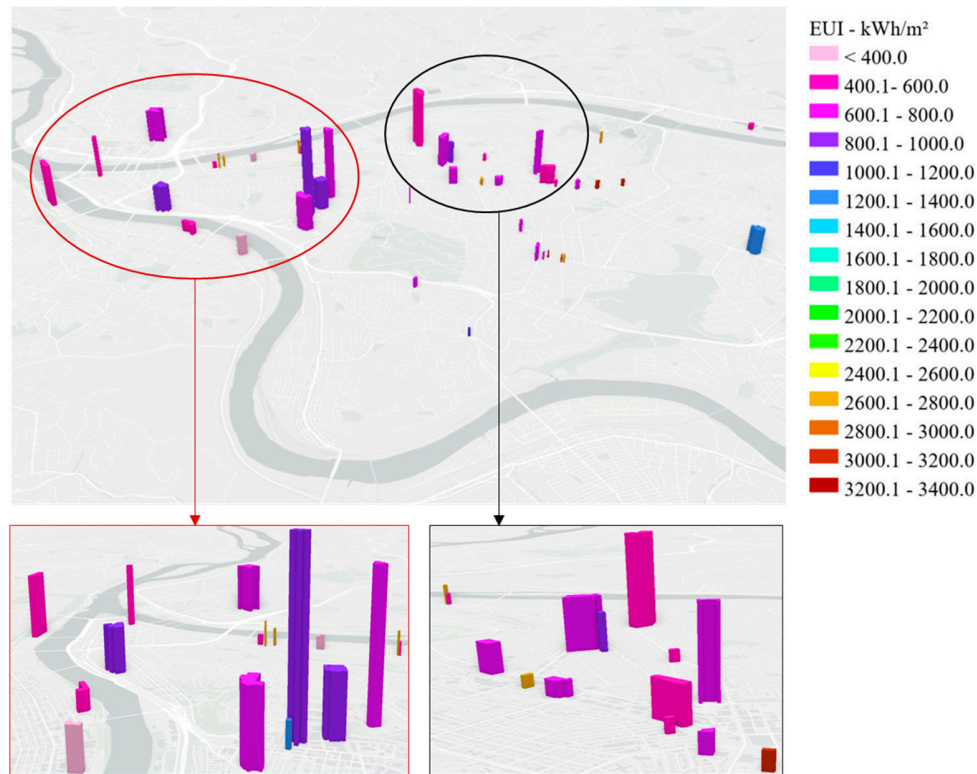

**Figure S2.** Annual energy use intensity (EUI) of the studied building stocks in Pittsburgh.

## References

- [1] M. Deru, K. Field, D. Studer, K. Benne, B. Griffith, P. Torcellini, B. Liu, M. Halverson, D. Winiarski, M. Rosenberg, U.S. Department of Energy Commercial Reference Building Models of the National Building Stock, National Renewable Energy Laboratory (NREL), Golden, CO (US), 2011.
- [2] J. Zhang, D.A. Zabrowski, D.W. Schrock, M.D. Lane, D.R. Fisher, R.A. Athalye, A. Livchak, B. Liu, Technical support document: 50% energy savings for quick-service restaurants. Pacific Northwest National Laboratory Richland, Washington 99352, 2010.
- [3] R. Hendron, Building America Research Benchmark Definition: Updated December 20, 2007, National Renewable Energy Laboratory (NREL), Golden, CO (US), 2008.
- [4] ASHRAE, ASHRAE Standard 62-1989–Ventilation for Acceptable Indoor Air Quality, Atlanta, GA (US), 1989.
- [5] ASHRAE, ASHRAE Standard 62.1-2013–Ventilation for Acceptable Indoor Air Quality, Atlanta, GA (US), 2013.
- [6] R.E. Jarnagin, B. Liu, D.W. Winiarski, M.F. McBride, L. Suharli, D. Walden, Technical Support Document: Development of the Advanced Energy Design Guide for Small Office Buildings, Pacific Northwest National Laboratory (PNNL), Richland, WA (US), 2006.
- [7] ASHRAE, HVAC Applications–ASHRAE Handbook Fundamentals, 2007.
- [8] U.S. Energy Information Administration, Commercial Buildings Energy Consumption Survey (CBECS), Washington, DC (US), 2018.
- [9] ASHRAE, ASHRAE Standard 90-1975–Energy Conservation in New Building Design, Atlanta, GA (US), 1975.

- [10] ASHRAE, ASHRAE Standard 90.1-1989–Energy Efficient Design of New Buildings Except Low-Rise Residential Buildings, Atlanta, GA (US), 1989.
- [11] ASHRAE, ASHRAE Standard 90.1-2004–Energy Standard for Buildings Except Low Rise Residential Buildings, Atlanta, GA (US), 2004.
- [12] G.G. Akkurt, N. Aste, J. Borderon, A. Buda, M. Calzolari, D. Chung, V. Costanzo, C. Del Pero, G. Evola, H.E. Huerto-Cardenas, F. Leonforte, A. Lo Faro, E. Lucchi, L. Marletta, F. Nocera, V. Pracchi, C. Turhan, Dynamic thermal and hygrometric simulation of historical buildings: Critical factors and possible solutions, *Renew. Sustain. Energy Rev.* 118 (2020), 109509.
- [13] D.W. Winiarski, W. Jiang, M.A. Halverson, Review of Pre-and Post-1980 Buildings in CBECS-HVAC Equipment, Pacific Northwest National Laboratory (PNNL), Richland, WA (US), 2006.
